# Supplementary material for: NOTCH signaling specifies arterial-type definitive hemogenic endothelium from human pluripotent stem cells
Source: PubMed Central journal article supplement (PMC5940870; doi:10.1038/s41467-018-04134-7), 2018-05-08
Supplement: 41467_2018_4134_MOESM1_ESM.pdf [file 41467_2018_4134_MOESM1_ESM.pdf]

**Supplemental Materials for**

**Uenishi et al.**

**NOTCH Signaling Specifies Arterial-Type Definitive Hemogenic Endothelium from**

**Human Pluripotent Stem Cells Uenishi et al**

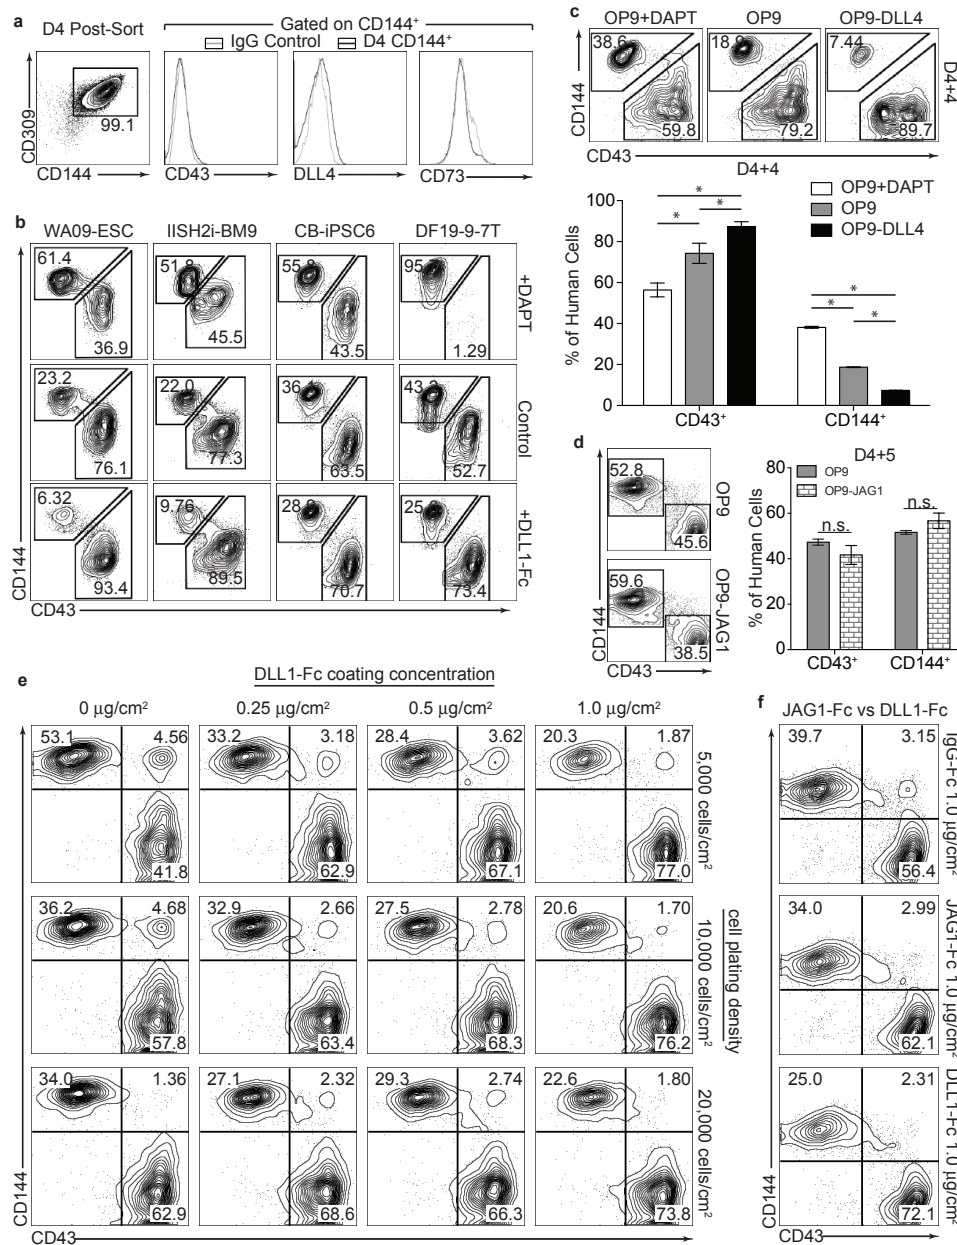

**Supplementary Figure 1. Determining the effect of NOTCH signaling on EHT.** (a) Phenotype of day 4 CD144<sup>+</sup> cells. (b) Effect of NOTCH inhibition and activation on hematopoiesis from D4 HE cells generated from WA09 ESCs, and iPSCs derived from bone marrow hematopoietic cells (IISH2i-BM9), cord blood (CB-iPSC6) and dermal fibroblasts (DF19-9-7T). The NOTCH effects are consistent across different hPSC lines. (c) Evaluation of EHT from D4 HE cultured on OP9, OP9-DLL4 or in presence of DAPT. NOTCH activation had similar effects on hematopoiesis whether in stroma/serum or stroma-/serum-free conditions. (d) Evaluation of EHT from D4 HE cultured on OP9 versus OP9-JAG1. OP9-JAG1 had little effect on EHT, unlike OP9-DLL4. Results in (c) and (d) are mean  $\pm$  SEM for at least 3 independent experiments; 2-way ANOVA Bonferroni post-hoc test, \* $p < .05$ , \*\* $p < .01$ , \*\*\* $p < .001$ . (e) Measuring the effect of increasing concentrations of DLL1-Fc with increasing cell density of D4 HE cells. (f) Effect of JAG1-Fc on hematopoiesis from day 4 HE. Representative histograms and contour plots from 3 independent experiments are shown.

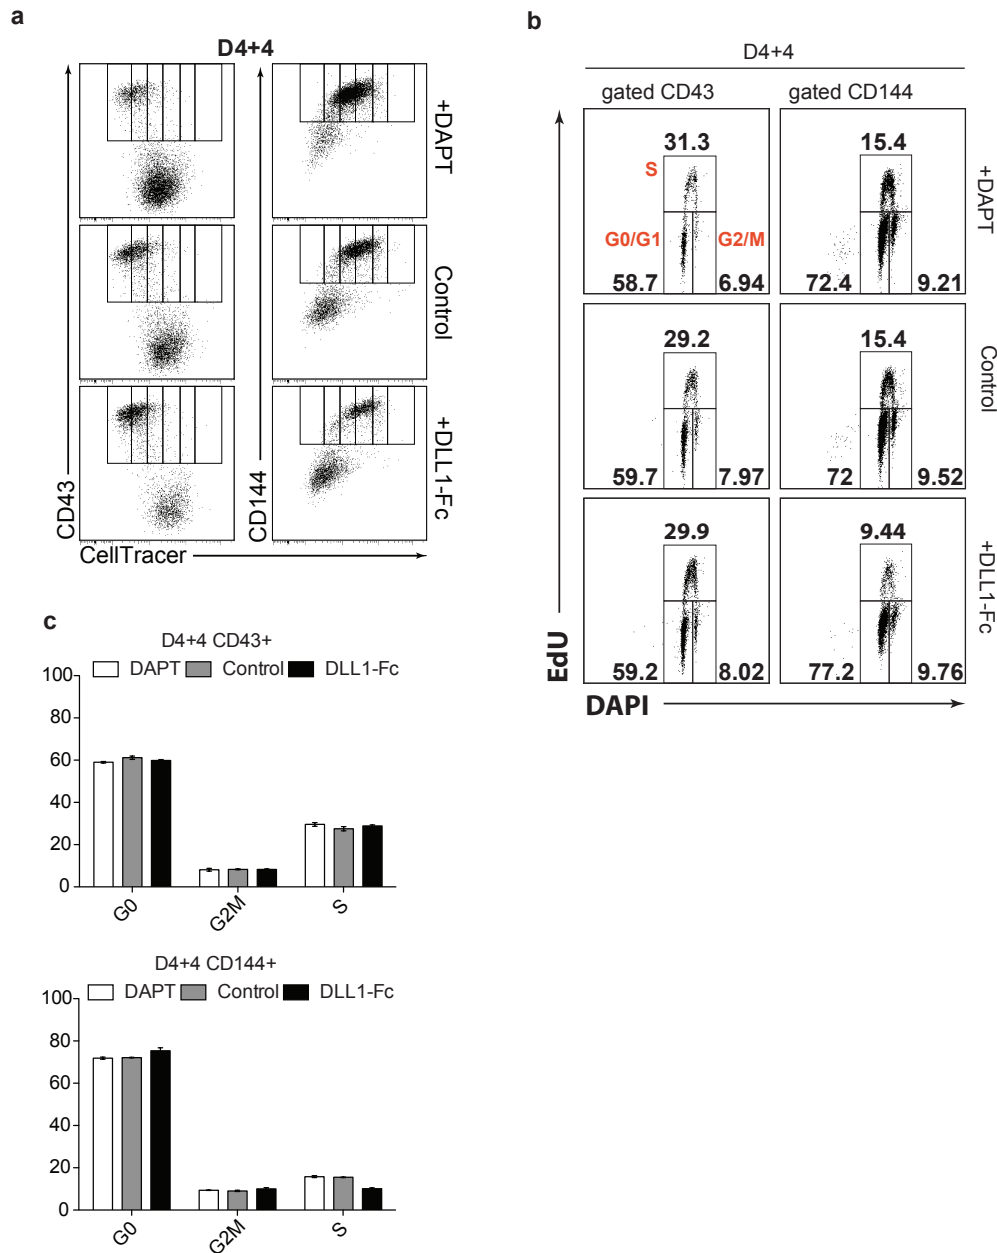

**Supplementary Figure 2. Effect of NOTCH signaling on proliferation and cycling of D4+4 cells.** (a) Representative flow cytometric cell proliferation analysis representing at least 3 independent experiments conducted with CellTracer. Generation gates were determined by concatenating D4 to D4+4 results and utilizing FlowJo's proliferation assay. (b) Representative dot plots show flow cytometric analysis of cell cycle using EdU and DAPI staining on D4+4 cells. (c) Bar graphs reveal no significant changes in cell cycling phases between each condition on D4+4. Results are mean  $\pm$  s.e.m. n=3.

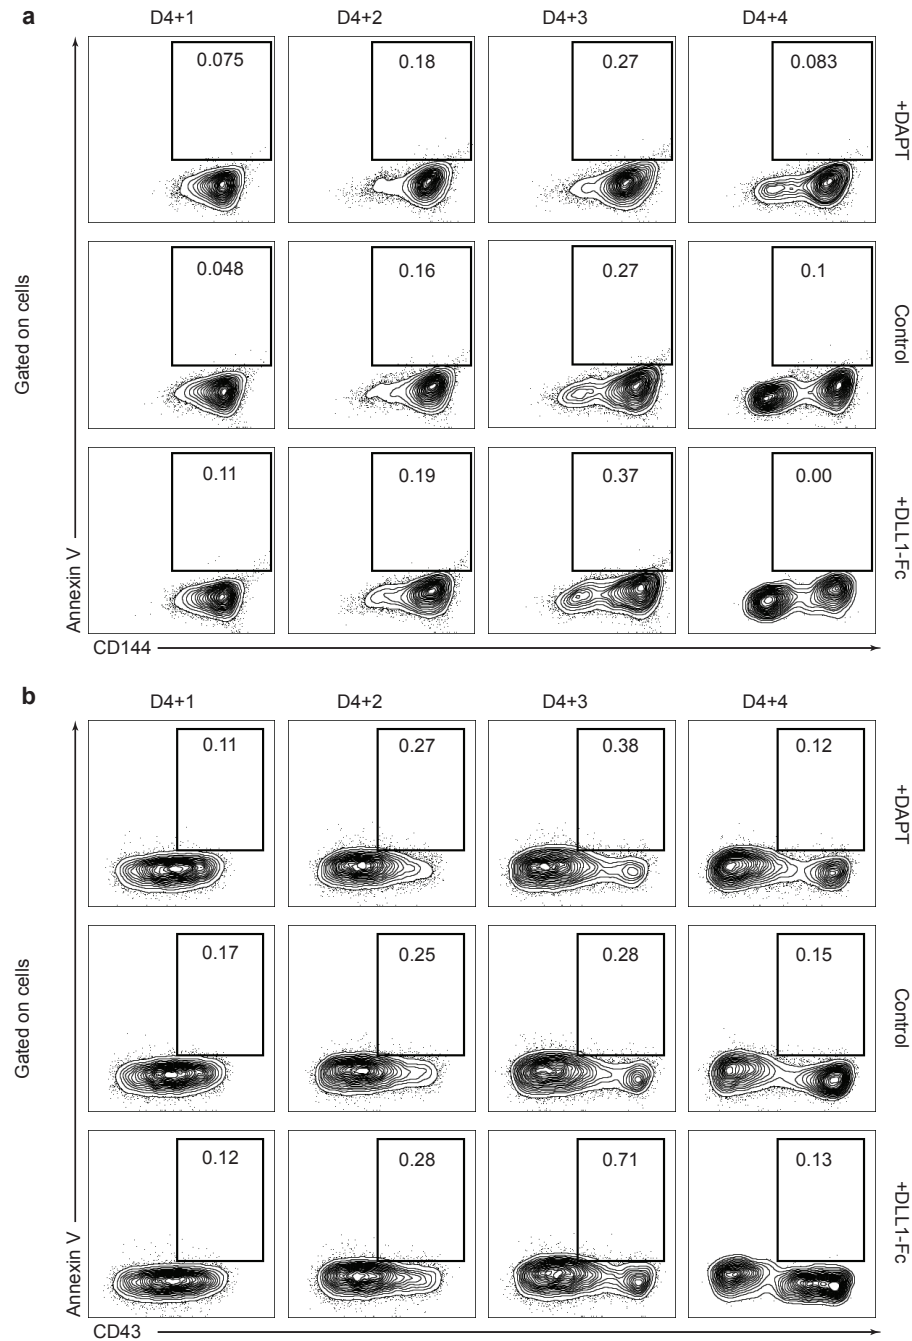

**Supplementary Figure 3. Flow cytometry of Annexin V to determine apoptosis during secondary culture of D4 HE cells in the presence of DAPT or DLL1-Fc.** Flow cytometry showing the percent of apoptotic cells via Annexin V staining in the (a) endothelial and (b) hematopoietic populations. Lack of significant differences in apoptotic cells in different conditions provides evidence that NOTCH signaling does not affect cell survival following EHT. Representative contour plots from 3 independent experiments are shown.

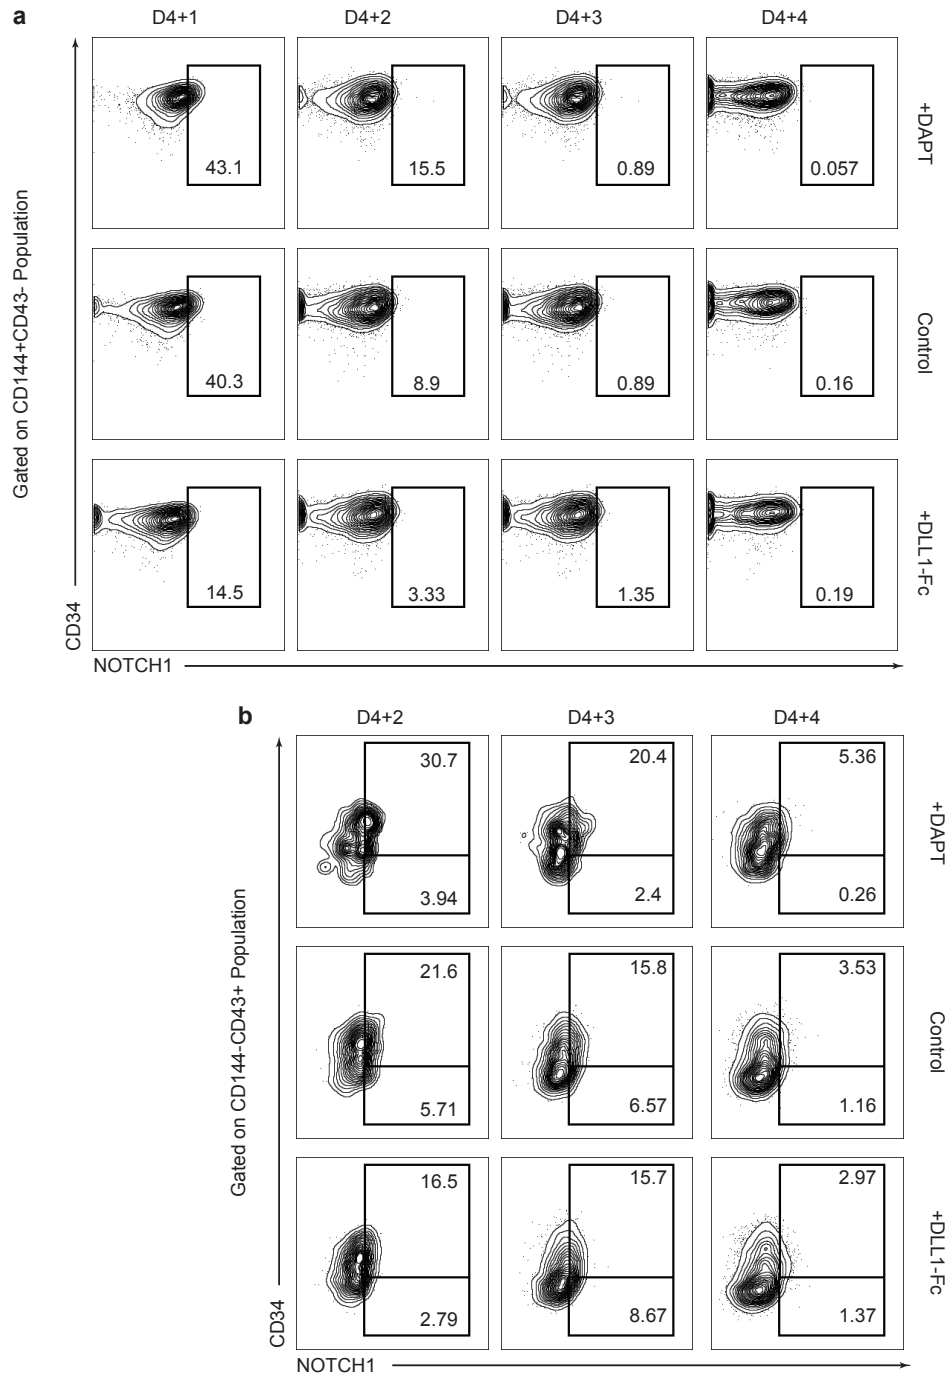

**Supplementary Figure 4. NOTCH1 expression in CD34<sup>+</sup> hematoendothelial populations during secondary culture of D4 HE cells in the presence of DAPT or DLL1-Fc.** (a) Expression of NOTCH1 on endothelial cells following secondary culture of D4 HE cells. CD144<sup>+</sup>CD43<sup>-</sup> endothelial cells have decreased NOTCH1 expression from D4+1 to D4+4 and (b) Expression of NOTCH1 on hematopoietic cells following secondary culture of D4 HE cells. CD144<sup>-</sup>CD34<sup>+</sup>CD43<sup>+</sup> hematopoietic progenitors have increased NOTCH1 expression D4+2 to D4+4 as compared to CD34<sup>-</sup>CD43<sup>+</sup> cells.

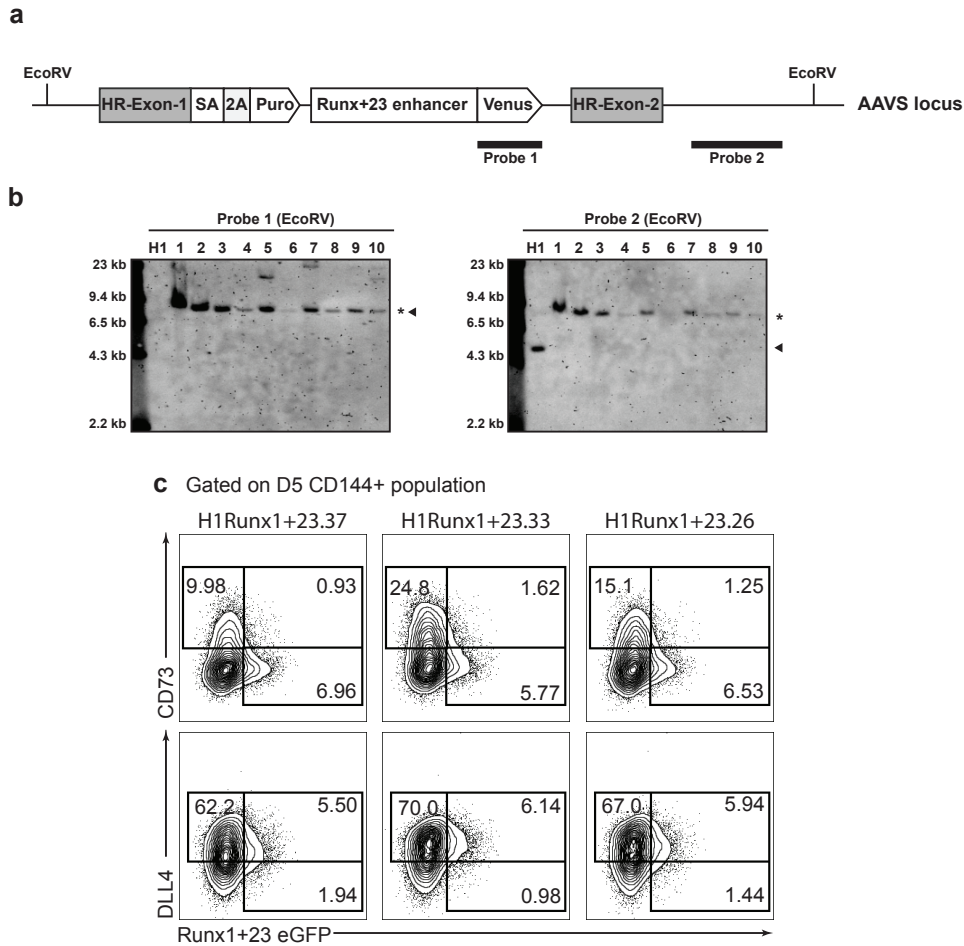

**Supplementary Figure 5. Generation of RUNX1+23-eGFP reporter WA01 hESC line.**

a) Schematic diagram of the construct used for the targeting of RUNX1+23-eGFP reporter into AAVS locus. Donor plasmid was integrated into the cleavage location of the Zinc Finger-Nuclease pair. b) Southern blot analysis of the WA01 cells targeted with the donor plasmid containing RUNX1+23-eGFP construct. Blot shows EcoRV digested genomic DNA hybridized with DIC-labeled 5' internal probe 1 (wt=no band, targeted=8.1kb) and 3'external probe 2 (wt=5.4kb, targeted=8.8kb). Filled arrow = wild type; Asterisk = targeted c) D5 flow of 3 different RUNX1+23 reporter hESC lines reveals that all eGFP+ cells are DLL4<sup>+</sup>CD73<sup>-</sup>.

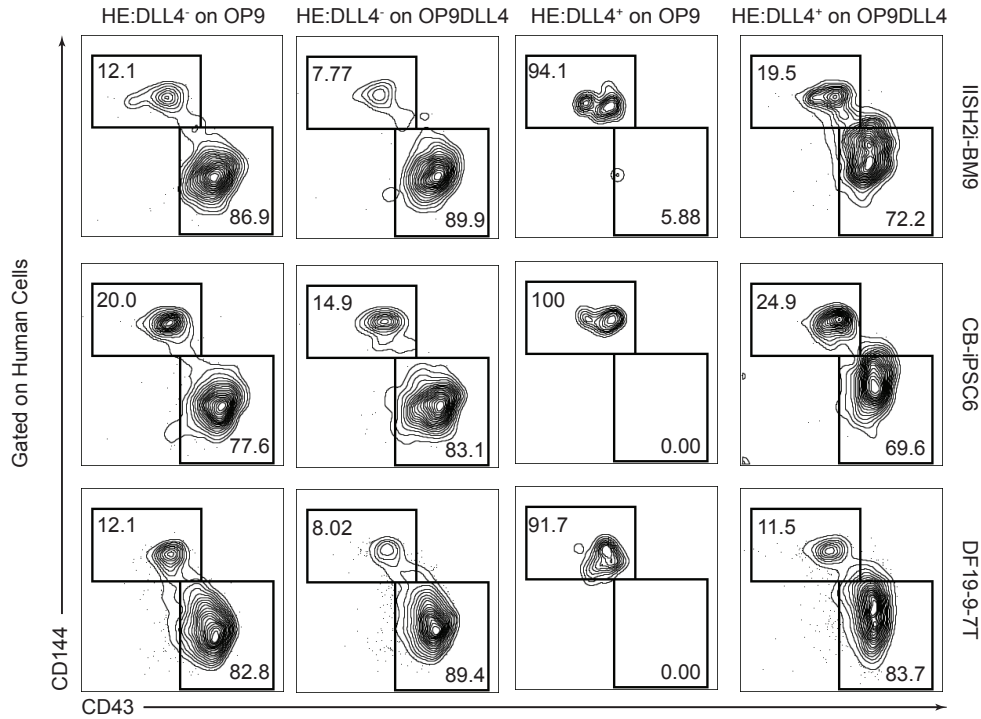

**Supplementary Figure 6. D5 HE subsets derived from different hiPSC lines have the same response to OP9 and OP9-DLL4.** Bone marrow IISH2iBM9, cord blood CB-iPSC6 or fibroblast-derived DF19-9-7T iPSCs were differentiated for 5 days in defined conditions. D5 HE:DLL4<sup>-</sup> and D5 HE:DLL4<sup>+</sup> were sorted and cultured on OP9 or OP9-DLL4 for 4 days. D5+4 flow plots of D5 HE cells demonstrate that D5 HE:DLL4<sup>+</sup> cells show hemogenic activity from only when cultured on OP9-DLL4. One experiment for each cell line is shown.

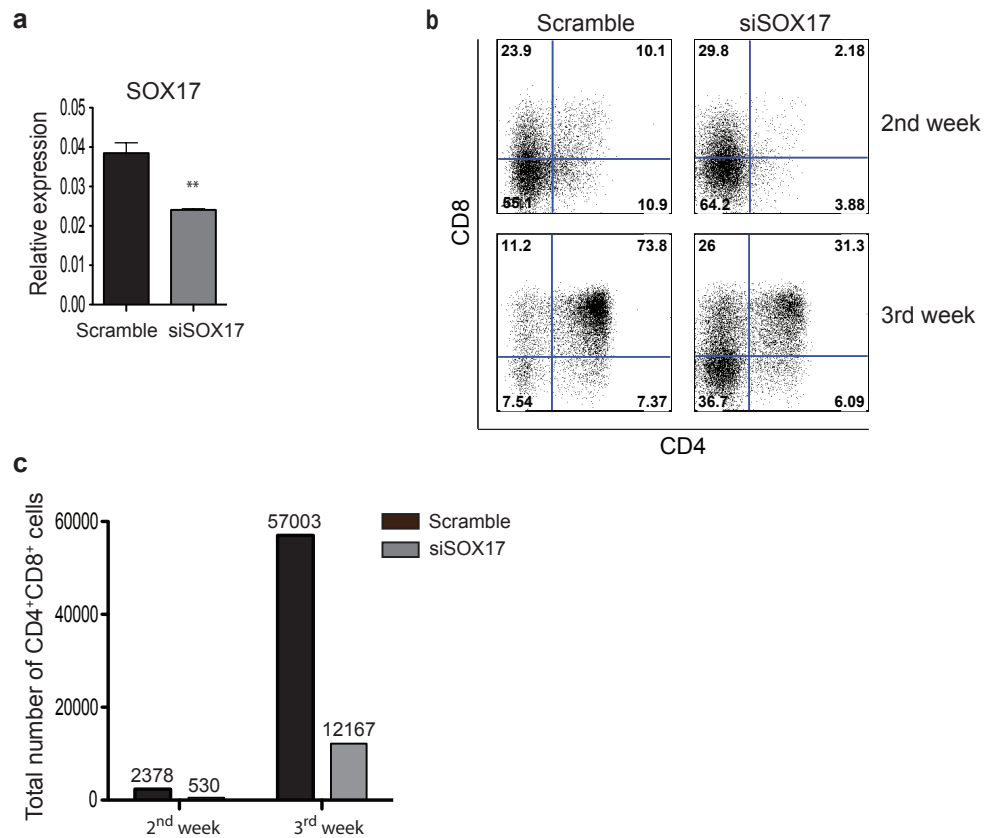

**Supplementary Figure 7. Knockdown of *SOX17* arterial gene with siRNA impairs lymphoid development from hESCs.** a) hESC differentiation cultures were transfected with SOX17 or scramble siRNA on D3 of differentiation. Graph shows qPCR analysis of SOX17 mRNA expression 48 hours after transfection (D5 of differentiation). Results are mean  $\pm$  SEM for at least 3 independent experiments; student's t-test, \* $p < .05$ , \*\* $p < .01$ , \*\*\* $p < .001$ . b) and c) shows T cell production by HPs collected on D8 of differentiation from cultures treated with SOX17 and scramble siRNA on D3 of differentiation. Representative dot plots (b) and total numbers of T cells produced from  $10^4$  HPs (c) after 2 and 3 weeks of culture in T cell conditions are shown.

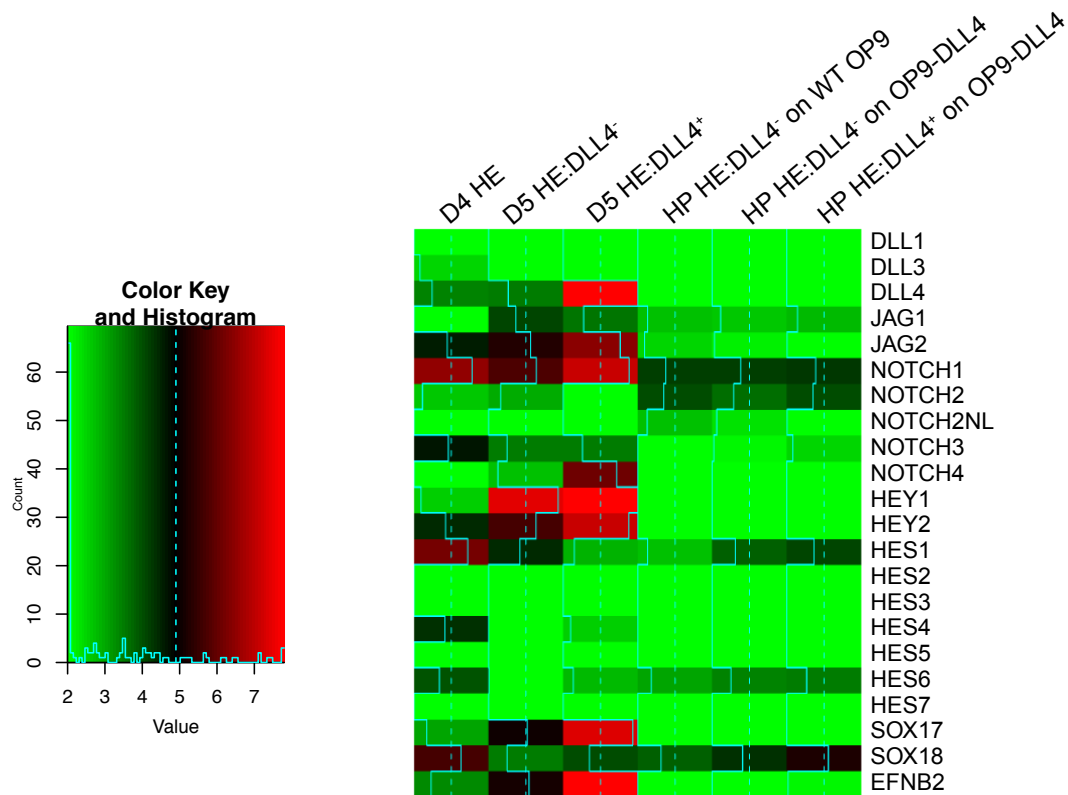

**Supplementary Figure 8. Expression of arterial and NOTCH signaling-associated genes in HE and HPs.** Heat map demonstrates expression of NOTCH signaling associated and arterial genes in immature D4 HE, D5 HE:DLL4<sup>+</sup> and HE:DLL4<sup>-</sup>, and hematopoietic progenitors CD34<sup>+</sup>CD45<sup>+</sup> generated from D5 HE:DLL4<sup>+</sup> and HE:DLL4<sup>-</sup> on wild type OP9 or OP9-DLL4 as depicted in Figure 6a. Log2-transformed Transcripts Per Million (log2(TPM)) are used for color mapping. The color gradient is set to reflect highly expressed genes as red, non-expressed genes as green and genes expressed at 30 tpm as black.

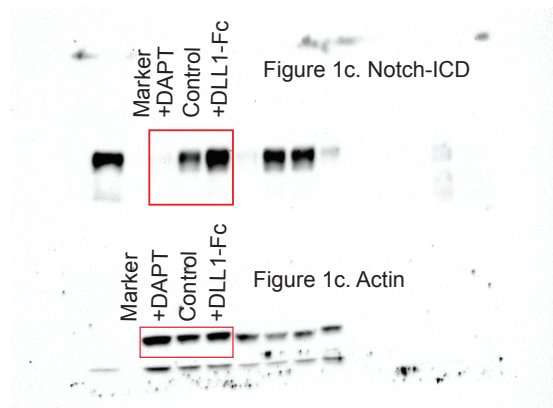

Membrane image of Figure 1c. Notch-ICD

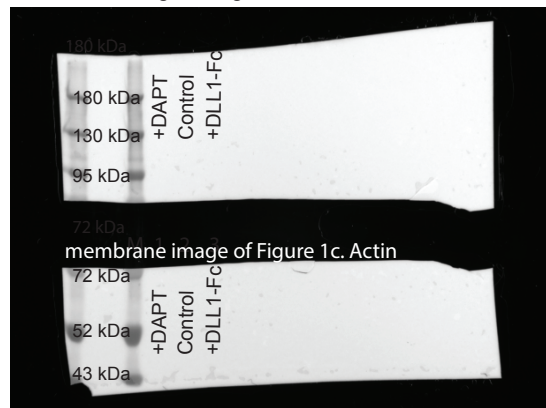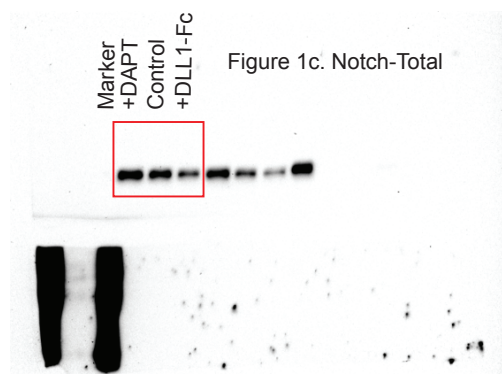

Membrane image of Figure 1c. Notch-Total

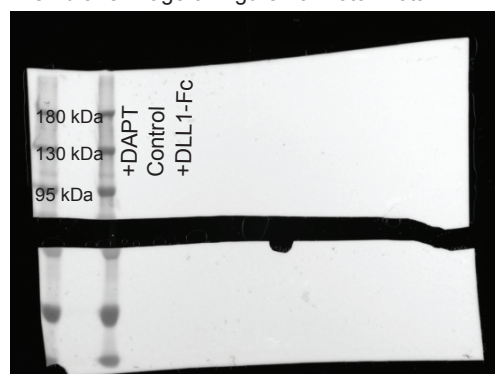

**Supplementary Figure 9.** Uncropped image of western blot presented in Figure 1c.

**Supplementary Table 1. Fluorescent Reagents Used in This Study**

| Reagent              | Fluorescence | Source           | Cat No  |
|----------------------|--------------|------------------|---------|
| 7-AAD                | 488/647      | Cayman Chemicals | 11397   |
| Annexin V            | PE           | BD Biosceinces   | 556421  |
| CellTracer           | 405/450      | ThermoFisher     | C34557  |
| Ghost Dye Red 780    | 633/780      | Tonbo Bio        | 13-0865 |
| Ghost Dye Violet 510 | 405/510      | Tonbo Bio        | 13-0870 |

**Supplementary Table 2. Antibodies Used in This Study**

| <b>Antigen</b> | <b>Conjugate</b> | <b>Source</b>   | <b>Clone</b> | <b>Cat No.</b> | <b>Dilution</b> |
|----------------|------------------|-----------------|--------------|----------------|-----------------|
| CD4            | APC              | BD Biosceinces  | RPA-T4       | 555349         | 1:50            |
| CD5            | PE-Vio770        | Miltenyi Biotec | 130-111-109  | REA782         | 1:50            |
| CD7            | FITC             | Miltenyi Biotec | 130-105-844  | CD7-6B7        | 1:50            |
| CD8            | PE               | BD Biosceinces  | HIT8a        | 555635         | 1:50            |
| CD31           | FITC             | BD Biosceinces  | WM59         | 555445         | 1:50            |
| CD31           | PE               | BD Biosceinces  | WM59         | 555446         | 1:50            |
| CD31           | MicroBeads       | Miltenyi Biotec | N/A          | 130-091-935    | 1:50            |
| CD34           | FITC             | BD Biosceinces  | 8G12         | 555821         | 1:50            |
| CD34           | PE-Vio770        | Miltenyi Biotec | 24D2         | 130-100-844    | 1:50            |
| CD41a          | PE               | BD Biosceinces  | HIP8         | 555467         | 1:50            |
| CD41a          | APC              | BD Biosceinces  | HIP8         | 559777         | 1:50            |
| CD41a          | PE-Cy5           | BD Biosceinces  | HIP8         | 559768         | 1:50            |
| CD41a          | PE-Cy7           | BD Biosceinces  | HIP8         | 561424         | 1:50            |
| CD41a          | FITC             | BD Biosceinces  | HIP8         | 555466         | 1:50            |
| CD41a          | PerCP-Cy5.5      | BD Biosceinces  | HIP8         | 340931         | 1:50            |
| CD41a          | PE               | Miltenyi Biotec | REA386       | 130-105-612    | 1:50            |
| CD41a          | APC-Vio770       | Miltenyi Biotec | REA386       | 130-105-563    | 1:50            |
| CD43           | PE               | BD Biosceinces  | 1G10         | 560199         | 1:50            |
| CD43           | APC              | BD Biosceinces  | 1G10         | 560198         | 1:50            |
| CD43           | BV421            | BD Biosceinces  | 1G10         | 562916         | 1:50            |
| CD43           | BV510            | BD Biosceinces  | 1G10         | 563377         | 1:50            |
| CD43           | PE               | Miltenyi Biotec | DF-T1        | 130-097-362    | 1:50            |
| CD43           | APC              | Miltenyi Biotec | DF-T1        | 130-097-367    | 1:50            |
| CD43           | APC-Vio770       | Miltenyi Biotec | DF-T1        | 130-101-174    | 1:50            |
| CD43           | VioBlue          | Miltenyi Biotec | DF-T1        | 130-097-373    | 1:50            |
| CD43           | purified         | BD Biosceinces  | 1G10         | 551457         | 1:50            |
| CD45           | PE               | BD Biosceinces  | HI30         | 555483         | 1:50            |
| CD45           | APC              | BD Biosceinces  | HI30         | 555485         | 1:50            |
| CD45           | BV421            | BD Biosceinces  | HI30         | 563879         | 1:50            |
| CD45           | PE               | Miltenyi Biotec | 130-080-201  | 5B1            | 1:50            |
| CD45           | PE-Vio770        | Miltenyi Biotec | 130-096-616  | 5B1            | 1:50            |
| CD45           | APC              | Miltenyi Biotec | 130-091-230  | 5B1            | 1:50            |
| CD45           | APC-Vio770       | Miltenyi Biotec | 130-096-609  | 5B1            | 1:50            |
| CD73           | PE               | BD Biosceinces  | AD2          | 550257         | 1:50            |
| CD73           | PE-Cy7           | BD Biosceinces  | AD2          | 561258         | 1:50            |
| CD73           | Purified         | BD Biosceinces  | AD2          | 550256         | 1:50            |
| CD73           | APC              | BD Biosceinces  | AD2          | 560847         | 1:50            |
| CD73           | FITC             | BD Biosceinces  | AD2          | 561254         | 1:50            |

| <b>Antigen</b> | <b>Conjugate</b> | <b>Source</b>       | <b>Clone</b>    | <b>Cat No.</b> | <b>Dilution</b> |
|----------------|------------------|---------------------|-----------------|----------------|-----------------|
| CD73           | BV421            | BD Biosceinces      | AD2             | 562430         | 1:50            |
| CD144          | PE               | BD Biosceinces      | 55-7H1          | 560410         | 1:50            |
| CD144          | FITC             | BD Biosceinces      | 55-7H1          | 560411         | 1:50            |
| CD144          | PerCP-Cy5.5      | BD Biosceinces      | 55-7H1          | 561566         | 1:50            |
| CD144          | PE-Vio770        | Miltenyi Biotec     | REA199          | 130-100-720    | 1:50            |
| CD144          | VioBlue          | Miltenyi Biotec     | REA199          | 130-100-724    | 1:50            |
| CD144          | purified         | eBioscience         | BV13            | 14-1441        | 1:50            |
| CD184          | PE               | BD Biosceinces      | 12G5            | 555974         | 1:50            |
| CD184          | PerCP-Cy5.5      | BD Biosceinces      | 12G5            | 560670         | 1:50            |
| CD235a         | PE               | BD Biosceinces      | GA-R2<br>(HIR2) | 555570         | 1:200           |
| CD235a         | FITC             | BD Biosceinces      | GA-R2<br>(HIR2) | 559943         | 1:200           |
| CD235a         | APC              | BD Biosceinces      | GA-R2<br>(HIR2) | 551336         | 1:200           |
| CD309          | PE               | BD Biosceinces      | 89106           | 560494         | 1:50            |
| CD309          | Alexa Fluor® 647 | BD Biosceinces      | 89106           | 560495         | 1:50            |
| CD309          | APC              | Miltenyi Biotec     | ES8-20E6        | 130-098-910    | 1:50            |
| Actin          | purified         | Santa Cruz          | C-2             | SC-8432        | 1:2000          |
| Mouse IgG      | Alexa Fluor® 488 | Life Technologies   | polyclonal      | A11001         | 1:50            |
| Mouse IgG      | HRP              | Santa Cruz          | polyclonal      | SC-2005        | 1:1000          |
| DLL4           | PE               | Miltenyi Biotec     | MHD4-46         | 130-096-567    | 1:50            |
| DLL4           | PE-Vio770        | Miltenyi Biotec     | MHD4-46         | 130-101-563    | 1:50            |
| DLL4           | PE               | R&D Systems         | 447506          | FAB1506P       | 1:50            |
| NOTCH1         | APC              | R&D Systems         | 527425          | FAB5317A       | 1:50            |
| NOTCH1         | purified         | Cell Signaling Tech | C37C7           | 3439           | 1:50            |
| NOTCH1-ICD     | purified         | Cell Signaling Tech | D3B8            | 4147           | 1:100           |
| Rabbit IgG     | Alexa Fluor® 594 | Life Technologies   | polyclonal      | A11012         | 1:50            |
| Rabbit IgG     | HRP              | Santa Cruz          | polyclonal      | SC-2004        | 1:1000          |

**Supplementary Table 3. Primers used for qRT-PCR in This Study**

| Gene   | Forward Sequence         | Reverse Sequence            |
|--------|--------------------------|-----------------------------|
| CXCR4  | TCAGTGGCTGACCTCCTCTT     | CTTGGCCTTTGACTGTTGGT        |
| DLL4   | CAGTGGGCAGCGAAGCTACA     | ACAGGCAGTGGTAGCCATCCTC      |
| EPHB2  | CTCCTCAACTGTGCCAAACCA    | GGTTATCCAGGCCCTCCAAA        |
| GATA2  | CCCTAAGCAGCGCAGCAA       | TGACTTCTCCTGCATGCACT        |
| HAND1  | GCCTACCTGATGGACGTGCT     | GCCGGTGCGTCCTTTAATCC        |
| HBA2   | CGGTCAACTTCAAGCTCCTAA    | GCCCACTCAGACTTTATT          |
| HBB    | GGCACCTTTGCCACACTG       | CACTGGTGGGGTGAATTCTT        |
| HBE1   | GCCTGTGGAGCAAGATGAAT     | GCGGGCTTGAGGTTGT            |
| HBG1   | CTTCAAGCTCCTGGGAAATGT    | GCAGAATAAAGCCTATCCTTGAAAG   |
| HBZ1   | CGGTGAAGAGCATCGACG       | GGATACGACCGATAGGAACTTGT     |
| HES1   | TACCCCAGCCAGTGTCAAC      | TCAGCTGGCTCAGACTTTCA        |
| HEY2   | TTCAAGGCAGCTCGGTAAGTAC   | CATACTGATGCACTGCTGGATGG     |
| MYB    | ACGGTCCGAAACGTTGGTCTG    | CCCCAGTCTCTTGTGTGCCTGG      |
| NOTCH1 | CAATGTGGATGCCGCAGTTGTG   | CAGCACCTTGGCGGTCTCGTA       |
| NR2F2  | TGGTTCCAAACCAGTTTATTCTGT | AAGTGCGTTTCCATCATCTTTGAG    |
| RPL13a | CCTGGAGGAGAAGAGGAAAGAGA  | TTGAGGACCTCTGTGTATTTGTCAA   |
| SOX17  | GCCAAGGGCGAGTCCCGTA      | GCATCTTGCTCAACTCGGCGTTGTGCA |
